# Supplementary material for: Designing ordered mesoporous aluminosilicates under acidic conditions via an intrinsic hydrolysis method
Source: Royal Society of Chemistry journal article supplement (doi:10.1039/c6dt02964g), 2016-12-05
Supplement: c6dt02964g1.pdf [file c6dt02964g1.pdf]

Electronic Supporting Information (ESI)

Architecting ordered mesoporous aluminosilicates under acidic condition  
via intrinsic hydrolysis method

Nunna V. Krishna<sup>a</sup> and Parasuraman Selvam<sup>\*a,b</sup>

<sup>a</sup>National Centre For Catalysis Research and Department of Chemistry,  
Indian Institute of Technology-Madras, Chennai 600036, India

<sup>b</sup>New Industry creation Hatchery Center, Tohoku University, Sendai, Japan

\*E-mail: selvam@iitm.ac.in

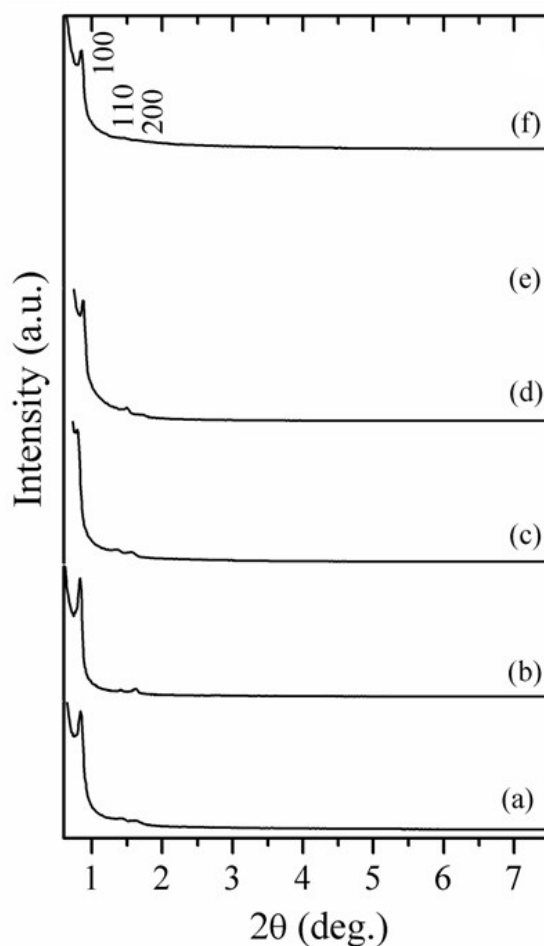

**Fig. S1** XRD patterns of as-synthesized: (a) SBA-15(D); (b) H-AISBA-15(I); (c) H-AISBA-15(D); (d) H-AISBA-15(P); (e) H-AISBA-15(G); (f) H-AISBA-15(H).

**Table S1** Acidity data of H-AISBA-15 synthesized *via* various preparation methods.

| Material   | Method | $n_{\text{Si}}/n_{\text{Al}}^{\text{a}}$ |          | $n_{\text{Si}}/n_{\text{Alr}}^{\text{b}}$ | $h_w$<br>(nm) | Acidic sites ( $\text{mmol g}^{-1}$ ) / $T_{\text{Des}}$ ( $^{\circ}\text{C}$ ) |            |            |
|------------|--------|------------------------------------------|----------|-------------------------------------------|---------------|---------------------------------------------------------------------------------|------------|------------|
|            |        | gel                                      | product  |                                           |               | Total                                                                           | (iii)      | (iv)       |
| SBA-15     | D      | $\infty$                                 | $\infty$ | $\infty$                                  | 3.80          | 0.06                                                                            | ---        | ---        |
| H-AISBA-15 | I      | 60                                       | 140      | 140                                       | 4.95          | 0.18                                                                            | 0.10 / 327 | 0.04 / 387 |
|            | D      | 60                                       | 125      | 157                                       | 4.06          | 0.16                                                                            | 0.06/314   | 0.02/382   |
|            | P      | 60                                       | 103      | 151                                       | 3.44          | 0.17                                                                            | 0.06/307   | 0.02/379   |
|            | G      | 60 <sup>c</sup>                          | 100      | 147                                       | 4.62          | 0.20                                                                            | 0.08/309   | 0.03/384   |
|            | H      | 60                                       | 107      | 153                                       | 4.15          | 0.16                                                                            | 0.07/307   | 0.02/382   |

<sup>a</sup> Determined by XRF.<sup>b</sup> Determined by <sup>27</sup>Al MAS-NMR.<sup>c</sup> Post-synthesis grafting of SBA-15 with appropriate aluminium source.**Table S2** Acidity data of H-AIITM-56 synthesized by intrinsic hydrolysis method.

| Material   | $n_{\text{Si}}/n_{\text{Al}}^{\text{a}}$ |          | $n_{\text{Si}}/n_{\text{Alr}}^{\text{b}}$ | $h_w$<br>(nm) | Acidic sites ( $\text{mmol g}^{-1}$ ) / $T_{\text{Des}}$ ( $^{\circ}\text{C}$ ) |          |          |
|------------|------------------------------------------|----------|-------------------------------------------|---------------|---------------------------------------------------------------------------------|----------|----------|
|            | gel                                      | product  |                                           |               | Total                                                                           | (iii)    | (iv)     |
| IITM-56    | $\infty$                                 | $\infty$ | $\infty$                                  | 2.48          | 0.06                                                                            | --       | --       |
| H-AIITM-56 | 90                                       | 240      | 240                                       | 2.45          | 0.09                                                                            | 0.05/291 | 0.01/358 |
|            | 60                                       | 144      | 144                                       | 2.57          | 0.12                                                                            | 0.06/292 | 0.01/361 |
|            | 30                                       | 80       | 80                                        | 2.66          | 0.22                                                                            | 0.09/297 | 0.02/365 |

<sup>a</sup> Determined by XRF; <sup>b</sup> Determined by <sup>27</sup>Al MAS-NMR.

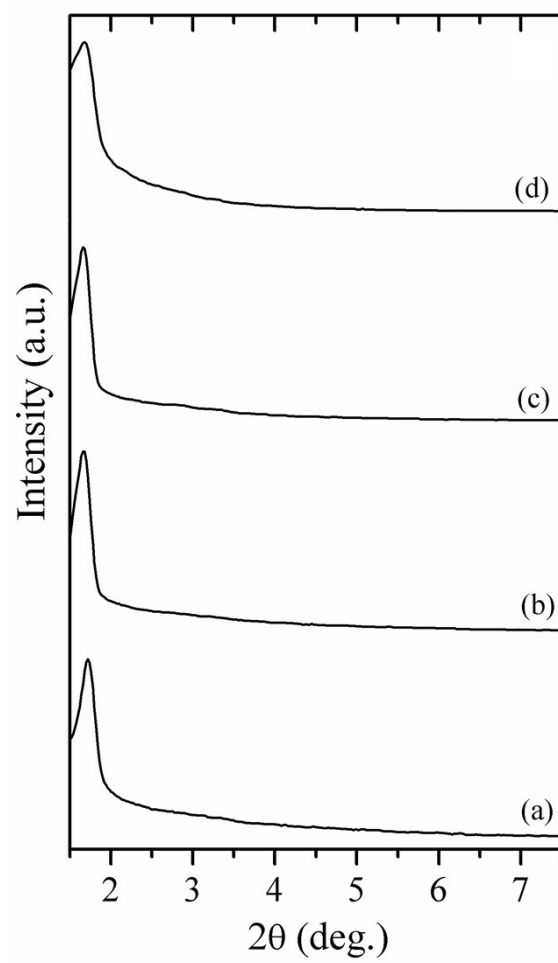

**Fig. S2** XRD patterns of synthesized: (a) IITM-56; (b) H-AIITM-56(90); (c) H-AIITM-56(60); (d) H-AIITM-56(30).
